# Supplementary material for: Modelling of the charge carrier mobility in disordered linear polymer materials
Source: Royal Society of Chemistry journal article supplement (doi:10.1039/c6cp07789g), 2017-01-01
Supplement: c6cp07789g1.pdf [file c6cp07789g1.pdf]

## Electronic Supplementary Information

### Modelling of the charge carrier mobility in disordered linear polymer materials

Petr Toman<sup>a,\*</sup>, Miroslav Menšík<sup>a</sup>, Wojciech Bartkowiak<sup>b</sup>, Jiří Pflieger<sup>a</sup>

<sup>a</sup> Institute of Macromolecular Chemistry, Academy of Sciences of the Czech Republic, v.v.i., Heyrovský Sq. 2, 162 06 Prague 6, Czech Republic

<sup>b</sup> Department of Physical and Quantum Chemistry, Faculty of Chemistry, Wrocław University of Science and Technology, Wyb. Wyspiańskiego 27, 50-370 Wrocław, Poland

\* E-mail: toman@imc.cas.cz

### Fragment orbital approach calculation of hole transfer integrals between covalently bound monomer units in a dimer using Gaussian 09 program

According to the fragment orbital procedure (see e.g. ref <sup>1,2</sup>), transfer integrals  $J_{A,B}$  between monomer units  $A$  and  $B$  of a dimer can be calculated as off-diagonal matrix elements of the Kohn–Sham Hamiltonian  $H$  expressed in the basis of the monomer (fragment) molecular orbitals.

The calculation procedure is following:

1) Single point DFT calculation of both monomers  $A$  and  $B$  as open-shell radicals is done with the following keywords

```
#P ROBPW91/AUG-cc-pVTZ
SCF=(Tight,Conver=8)
IOP(6/7=3)
IOP(3/33=1)
IOP(2/15=1)
NoRaff
IOP(2/12=3)
```

Monomer units are capped on the outer side with hydrogens and left radical in place of the split central bond of the dimer. Using open-shell radicals rely on the fact, that the  $\sigma$ -bond between thiophene monomer units, which is cut, is fairly orthogonal to the  $\pi$ -system, where the charge carrier transfer takes place.

These calculations provide molecular orbital matrices  $C_A$  and  $C_B$  (in atomic orbital basis sets). The fragment orbital transformation matrix  $T$  is then created as a block diagonal matrix with matrices  $C_A$  and  $C_B$  on its diagonal.

2) Single point DFT calculation of the dimer is done with the following keywords

```
#P BPW91/AUG-cc-pVTZ
SCF=(Tight,Conver=8)
IOP(6/7=3)
```

IOP(3/33=1)  
IOP(2/15=1)  
NoRaff  
IOP(2/12=3)  
IOP(5/33=3)  
IOP(3/32=2)

Dimer is capped on both sides with hydrogens. Cartesian atomic coordinates of the dimer should be the same as atomic coordinates of the monomers. Atoms of monomer *A* should be placed before atoms of monomer *B*.

This calculation provides the overlap matrix  $S_{AO}$ , molecular orbital matrix  $C_{AO}$ , and the Kohn-Sham Hamiltonian matrix  $H_{AO}$  – all in the atomic orbital representation. Also the diagonal molecular orbital energy matrix  $E$  (eigenenergies of  $H_{AO}$ ) is calculated.

Alternatively, the resulting Kohn-Sham Hamiltonian matrix can be calculated as  $H_{AO} = S_{AO} C_{AO} E C_{AO}^{-1}$  in order to reduce the size of the Gaussian output file.

3) Transformation of matrices  $H_{AO}$ ,  $S_{AO}$ , and  $C_{AO}$  into the basis of the monomer (fragment) molecular orbitals:

$$H = T^T H_{AO} T,$$

$$S = T^T S_{AO} T,$$

$$C = T^{-1} C_{AO},$$

where  $T^T$  is the transposed transformation matrix  $T$ .

4) Checking of the transformation:

The transformed matrices should satisfy equation  $HC = SCE$ .

5) The hole transfer integral  $J_{A,B}$  is given by the matrix element  $\langle \text{HOMO}_A | H | \text{HOMO}_B \rangle$  of the Hamiltonian matrix  $H$  corresponding to the HOMOs of the fragments *A* and *B*.

**Finally, the effective (generalized) hole transfer integral  $b_{A,B}$  (used in Eq.(1)) is then calculated as**

$$b_{A,B} = J_{A,B} - \frac{1}{2} S_{A,B} (\epsilon_A + \epsilon_B),$$

where

$S_{A,B} = \langle \text{HOMO}_A | S | \text{HOMO}_B \rangle$  is the overlap integral of both HOMOs and

$\epsilon_A = \langle \text{HOMO}_A | H | \text{HOMO}_A \rangle$  and  $\epsilon_B = \langle \text{HOMO}_B | H | \text{HOMO}_B \rangle$  are the hole site energies.

## References

- 1 F. C. Grozema and L. D. A. Siebbeles, *Int. Rev. Phys. Chem.*, 2008, **27**, 87–138.
- 2 K. Senthilkumar, F. C. Grozema, F. M. Bickelhaupt and L. D. A. Siebbeles, *J. Chem. Phys.*, 2003, **119**, 9809–9817.
